# Supplementary material
Source: Springer Nature journal article supplement (https://www.springermedizin.de/resource/supplementary/12872_2014_769_MOESM10_ESM.docx/9430454)

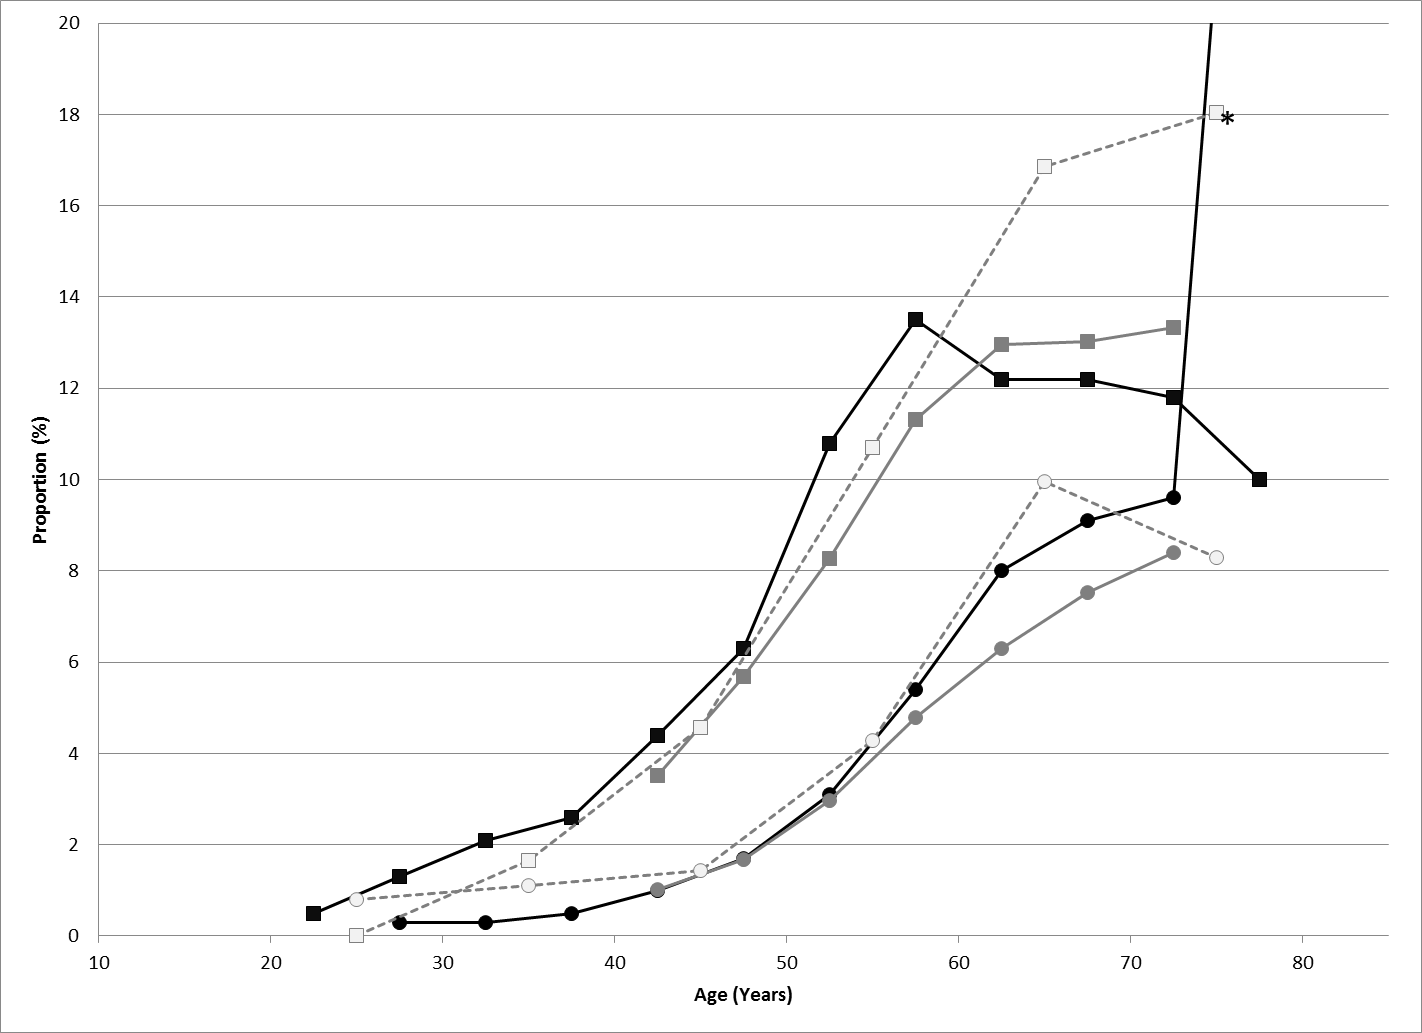


**Figure 10**

Supplement: MOESM10 [file 9430454]
